# Supplementary material for: Highly efficient overlayer derived from peroxotitanium for dye-sensitized solar cells
Source: Royal Society of Chemistry journal article supplement (doi:10.1039/c2ta00688j), 2012-11-08
Supplement: c2ta00688j.pdf [file c2ta00688j.pdf]

## Supporting Information

### **High Efficient Overlayer Derived from Peroxotitanium for Dye-sensitized Solar Cells**

*Shuang Yang<sup>1</sup>, Yu Hou<sup>1</sup>, Bo Zhang<sup>1</sup>, Xiao Hua Yang<sup>1</sup>, Wenqi Fang<sup>1</sup>, Hui Jun Zhao<sup>2</sup>  
and Hua Gui Yang\*<sup>1</sup>*

<sup>1</sup> Key Laboratory for Ultrafine Materials of Ministry of Education, School of Materials Science and Engineering, East China University of Science and Technology, 130 Meilong Road, Shanghai, 200237, China

<sup>2</sup> Centre for Clean Environment and Energy, Gold Coast Campus, Griffith University, Queensland 4222, Australia

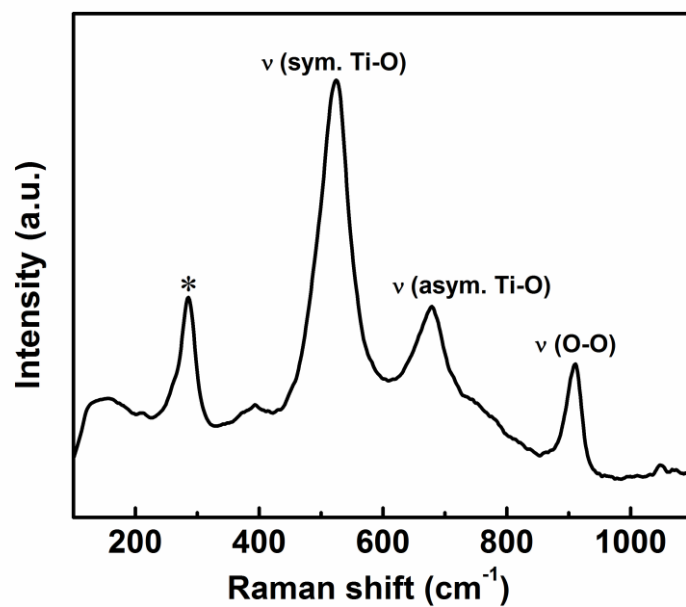

Figure S1. FT-Raman spectrum of dried peroxotitanium solution.

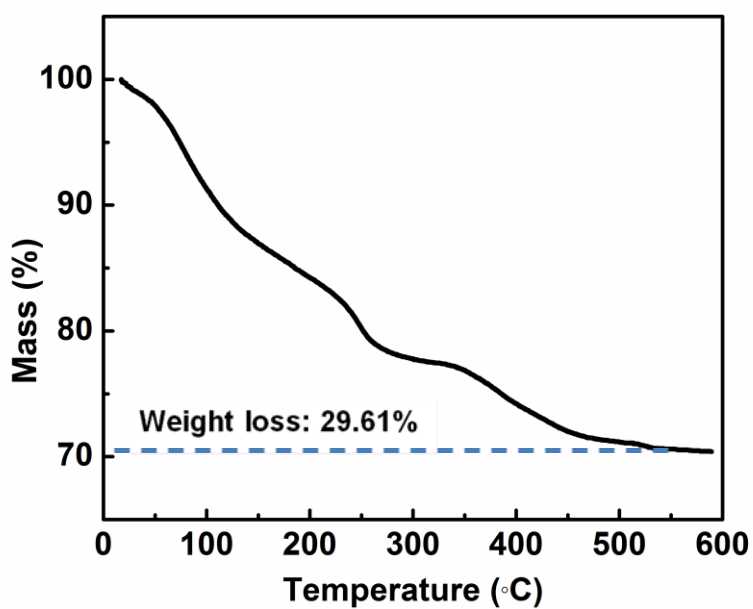

Figure S2. TG of the dried peroxotitanium gel (60 °C). Heating rate is 10 °C/min.

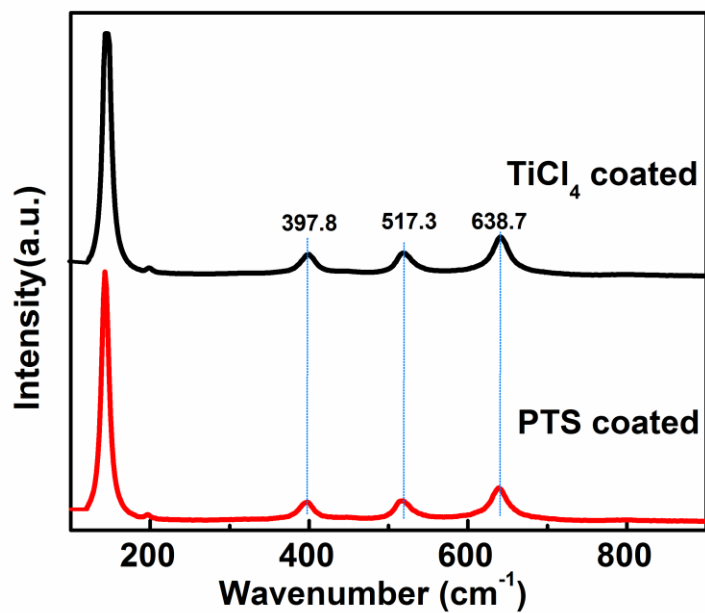

**Figure S3.** FT-Raman spectrum of TiCl<sub>4</sub> and PTS coated TiO<sub>2</sub> films.

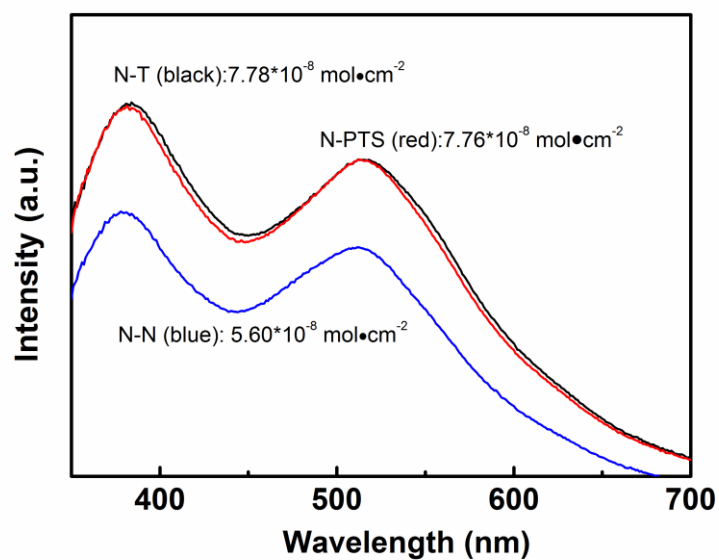

**Figure S4.** UV-vis absorption spectrum of N719 dye absorption on TiO<sub>2</sub> photoanode.

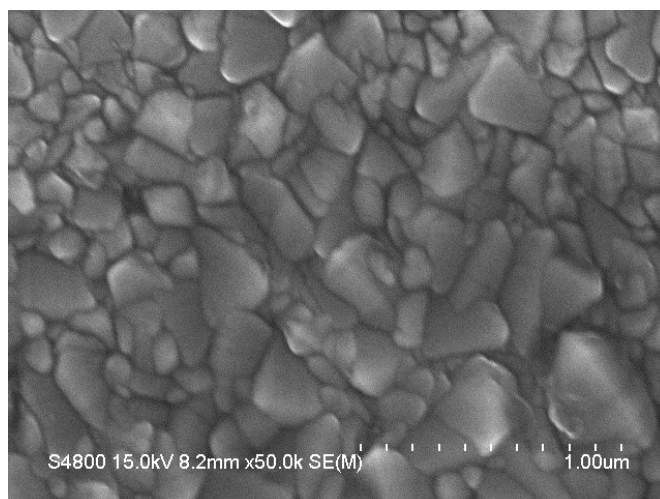

**Figure S5.** SEM images of bare FTO substrate.

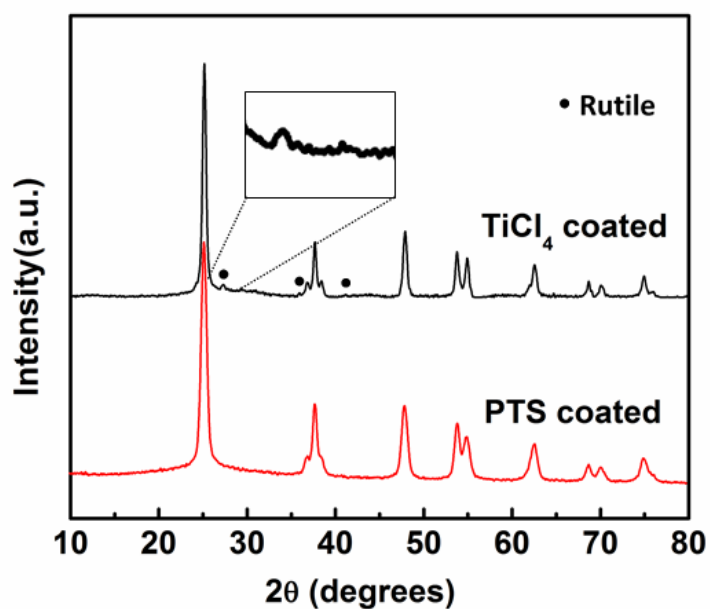

**Figure S6.** X-ray diffraction pattern of  $\text{TiCl}_4$  and PTS coated anatase films. The anatase was about 20nm in diameter reported previously.<sup>[1]</sup>

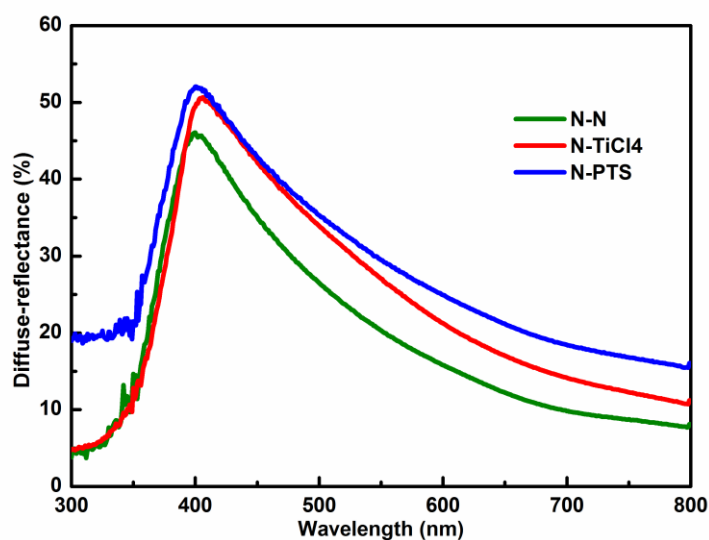

**Figure S7.** Diffuse reflectance spectra of the TiO<sub>2</sub> films without overlayer (green), TiCl<sub>4</sub> overlayer (red) and PTS overlayer (blue).

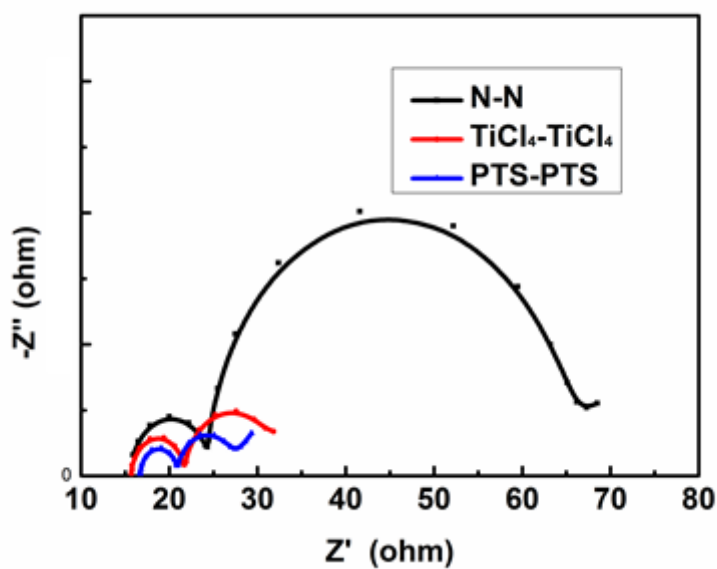

**Figure S8.** Nyquist plots of DSSCs fabricated with different blocking layers and overlayers on the whole TiO<sub>2</sub> films.

## Reference

- [1] S. Ito, T. N. Murakami, P. Comte, P. Liska, C. Grätzel, M. K. Nazeeruddin, M. Grätzel, *Thin Solid Films* **2008**, *516*, 4613-4619.
